# Supplementary material for: Game—The Zu Zitter Game: A Course-Long Tool for Teaching Operations Management
Source: Atypon-hosted journal article supplement (doi:10.1287/ited.2015.0138), 2015-05-01
Supplement: ited-2015.0138-unrestricted-sm [file ited-2015.0138-unrestricted-sm%2Fexampledemandorderforms.doc]

**Team: Week: 1**

| **Product** | **Weekly Demand** | **Will Accept Base** |  | **Units Shipped** | | |
| --- | --- | --- | --- | --- | --- | --- |
| **Base** | **Red** | **Green** |
| Zu Zitter (Base) | **11** | 11 |  |  |  |  |
| w/ Red Carzay | **7** | 1 |  |  |  |  |
| w/ Green Carzay | **8** | 2 |  |  |  |  |
|  | **Total Shipped:** | | |  |  |  |

**Team: Week: 6**

| **Product** | **Weekly Demand** | **Will Accept Base** |  | **Units Shipped** | | |
| --- | --- | --- | --- | --- | --- | --- |
| **Base** | **Red** | **Green** |
| Zu Zitter (Base) | **16** | 16 |  |  |  |  |
| w/ Red Carzay | **5** | 2 |  |  |  |  |
| w/ Green Carzay | **8** | 3 |  |  |  |  |
|  | **Total Shipped:** | | |  |  |  |

**Team: Week: 11**

| **Product** | **Weekly Demand** | **Will Accept Base** |  | **Units Shipped** | | |
| --- | --- | --- | --- | --- | --- | --- |
| **Base** | **Red** | **Green** |
| Zu Zitter (Base) | **10** | 10 |  |  |  |  |
| w/ Red Carzay | **6** | 2 |  |  |  |  |
| w/ Green Carzay | **9** | 5 |  |  |  |  |
|  | **Total Shipped:** | | |  |  |  |

**Team: Week: 16**

| **Product** | **Weekly Demand** | **Will Accept Base** |  | **Units Shipped** | | |
| --- | --- | --- | --- | --- | --- | --- |
| **Base** | **Red** | **Green** |
| Zu Zitter (Base) | **15** | 15 |  |  |  |  |
| w/ Red Carzay | **9** | 3 |  |  |  |  |
| w/ Green Carzay | **11** | 3 |  |  |  |  |
|  | **Total Shipped:** | | |  |  |  |

**Team: Week: 2**

| **Product** | **Weekly Demand** | **Will Accept Base** |  | **Units Shipped** | | |
| --- | --- | --- | --- | --- | --- | --- |
| **Base** | **Red** | **Green** |
| Zu Zitter (Base) | **15** | 15 |  |  |  |  |
| w/ Red Carzay | **9** | 2 |  |  |  |  |
| w/ Green Carzay | **10** | 3 |  |  |  |  |
|  | **Total Shipped:** | | |  |  |  |

**Team: Week: 7**

| **Product** | **Weekly Demand** | **Will Accept Base** |  | **Units Shipped** | | |
| --- | --- | --- | --- | --- | --- | --- |
| **Base** | **Red** | **Green** |
| Zu Zitter (Base) | **11** | 11 |  |  |  |  |
| w/ Red Carzay | **2** | 1 |  |  |  |  |
| w/ Green Carzay | **10** | 3 |  |  |  |  |
|  | **Total Shipped:** | | |  |  |  |

**Team: Week: 12**

| **Product** | **Weekly Demand** | **Will Accept Base** |  | **Units Shipped** | | |
| --- | --- | --- | --- | --- | --- | --- |
| **Base** | **Red** | **Green** |
| Zu Zitter (Base) | **19** | 19 |  |  |  |  |
| w/ Red Carzay | **9** | 2 |  |  |  |  |
| w/ Green Carzay | **7** | 4 |  |  |  |  |
|  | **Total Shipped:** | | |  |  |  |

**Team: Week: 17**

| **Product** | **Weekly Demand** | **Will Accept Base** |  | **Units Shipped** | | |
| --- | --- | --- | --- | --- | --- | --- |
| **Base** | **Red** | **Green** |
| Zu Zitter (Base) | **13** | 13 |  |  |  |  |
| w/ Red Carzay | **6** | 1 |  |  |  |  |
| w/ Green Carzay | **10** | 4 |  |  |  |  |
|  | **Total Shipped:** | | |  |  |  |

**Team: Week: 3**

| **Product** | **Weekly Demand** | **Will Accept Base** |  | **Units Shipped** | | |
| --- | --- | --- | --- | --- | --- | --- |
| **Base** | **Red** | **Green** |
| Zu Zitter (Base) | **17** | 17 |  |  |  |  |
| w/ Red Carzay | **4** | 0 |  |  |  |  |
| w/ Green Carzay | **12** | 4 |  |  |  |  |
|  | **Total Shipped:** | | |  |  |  |

**Team: Week: 8**

| **Product** | **Weekly Demand** | **Will Accept Base** |  | **Units Shipped** | | |
| --- | --- | --- | --- | --- | --- | --- |
| **Base** | **Red** | **Green** |
| Zu Zitter (Base) | **9** | 9 |  |  |  |  |
| w/ Red Carzay | **7** | 3 |  |  |  |  |
| w/ Green Carzay | **5** | 1 |  |  |  |  |
|  | **Total Shipped:** | | |  |  |  |

**Team: Week: 13**

| **Product** | **Weekly Demand** | **Will Accept Base** |  | **Units Shipped** | | |
| --- | --- | --- | --- | --- | --- | --- |
| **Base** | **Red** | **Green** |
| Zu Zitter (Base) | **10** | 10 |  |  |  |  |
| w/ Red Carzay | **4** | 2 |  |  |  |  |
| w/ Green Carzay | **7** | 1 |  |  |  |  |
|  | **Total Shipped:** | | |  |  |  |

**Team: Week: 18**

| **Product** | **Weekly Demand** | **Will Accept Base** |  | **Units Shipped** | | |
| --- | --- | --- | --- | --- | --- | --- |
| **Base** | **Red** | **Green** |
| Zu Zitter (Base) | **16** | 16 |  |  |  |  |
| w/ Red Carzay | **5** | 2 |  |  |  |  |
| w/ Green Carzay | **5** | 0 |  |  |  |  |
|  | **Total Shipped:** | | |  |  |  |

**Team: Week: 4**

| **Product** | **Weekly Demand** | **Will Accept Base** |  | **Units Shipped** | | |
| --- | --- | --- | --- | --- | --- | --- |
| **Base** | **Red** | **Green** |
| Zu Zitter (Base) | **19** | 19 |  |  |  |  |
| w/ Red Carzay | **9** | 2 |  |  |  |  |
| w/ Green Carzay | **8** | 1 |  |  |  |  |
|  | **Total Shipped:** | | |  |  |  |

**Team: Week: 9**

| **Product** | **Weekly Demand** | **Will Accept Base** |  | **Units Shipped** | | |
| --- | --- | --- | --- | --- | --- | --- |
| **Base** | **Red** | **Green** |
| Zu Zitter (Base) | **15** | 15 |  |  |  |  |
| w/ Red Carzay | **7** | 2 |  |  |  |  |
| w/ Green Carzay | **7** | 2 |  |  |  |  |
|  | **Total Shipped:** | | |  |  |  |

**Team: Week: 14**

| **Product** | **Weekly Demand** | **Will Accept Base** |  | **Units Shipped** | | |
| --- | --- | --- | --- | --- | --- | --- |
| **Base** | **Red** | **Green** |
| Zu Zitter (Base) | **19** | 19 |  |  |  |  |
| w/ Red Carzay | **7** | 2 |  |  |  |  |
| w/ Green Carzay | **11** | 3 |  |  |  |  |
|  | **Total Shipped:** | | |  |  |  |

**Team: Week: 19**

| **Product** | **Weekly Demand** | **Will Accept Base** |  | **Units Shipped** | | |
| --- | --- | --- | --- | --- | --- | --- |
| **Base** | **Red** | **Green** |
| Zu Zitter (Base) | **15** | 15 |  |  |  |  |
| w/ Red Carzay | **11** | 4 |  |  |  |  |
| w/ Green Carzay | **7** | 4 |  |  |  |  |
|  | **Total Shipped:** | | |  |  |  |

**Team: Week: 5**

| **Product** | **Weekly Demand** | **Will Accept Base** |  | **Units Shipped** | | |
| --- | --- | --- | --- | --- | --- | --- |
| **Base** | **Red** | **Green** |
| Zu Zitter (Base) | **15** | 15 |  |  |  |  |
| w/ Red Carzay | **4** | 1 |  |  |  |  |
| w/ Green Carzay | **5** | 2 |  |  |  |  |
|  | **Total Shipped:** | | |  |  |  |

**Team: Week: 10**

| **Product** | **Weekly Demand** | **Will Accept Base** |  | **Units Shipped** | | |
| --- | --- | --- | --- | --- | --- | --- |
| **Base** | **Red** | **Green** |
| Zu Zitter (Base) | **15** | 15 |  |  |  |  |
| w/ Red Carzay | **10** | 4 |  |  |  |  |
| w/ Green Carzay | **7** | 3 |  |  |  |  |
|  | **Total Shipped:** | | |  |  |  |

**Team: Week: 15**

| **Product** | **Weekly Demand** | **Will Accept Base** |  | **Units Shipped** | | |
| --- | --- | --- | --- | --- | --- | --- |
| **Base** | **Red** | **Green** |
| Zu Zitter (Base) | **9** | 9 |  |  |  |  |
| w/ Red Carzay | **11** | 4 |  |  |  |  |
| w/ Green Carzay | **8** | 2 |  |  |  |  |
|  | **Total Shipped:** | | |  |  |  |

**Team: Week: 20**

| **Product** | **Weekly Demand** | **Will Accept Base** |  | **Units Shipped** | | |
| --- | --- | --- | --- | --- | --- | --- |
| **Base** | **Red** | **Green** |
| Zu Zitter (Base) | **15** | 15 |  |  |  |  |
| w/ Red Carzay | **8** | 2 |  |  |  |  |
| w/ Green Carzay | **6** | 1 |  |  |  |  |
|  | **Total Shipped:** | | |  |  |  |

**Team: Week:**

**⃞** Whoville Steel Order ($10 processing fee)

| **Order** | **Setup Fee** | **Product** | **Unit Price** | **Shipping** | **Quantity** |
| --- | --- | --- | --- | --- | --- |
| ⃞ | $40 | Steel strip – blue, 8-½” x ¾” | $20 | $5 |  |
| ⃞ | $40 | Steel strip – yellow, 5-½” x ¾” | $15 | $5 |  |
| ⃞ | $40 | Steel strip – red, 5-½” x ¾” | $35 | $5 |  |
| ⃞ | $40 | Steel strip – green, 5-½” x ¾” | $35 | $5 |  |

**⃞** Max Welker Welding Order ($100 processing fee)

| **Order** | **Setup Fee** | **Product** | **Unit Price** | **Shipping** | **Quantity** |
| --- | --- | --- | --- | --- | --- |
| ⃞ | - | Basic welding wire – 50 count | $75 | $15 |  |
| ⃞ | - | Red welding wire – 100 count | $200 | $30 |  |
| ⃞ | - | Green welding wire – 100 count | $200 | $30 |  |
|  | | Welder (one week rental) | $50 | - |  |

**Team: Week:**

**⃞** Whoville Steel Order ($10 processing fee)

| **Order** | **Setup Fee** | **Product** | **Unit Price** | **Shipping** | **Quantity** |
| --- | --- | --- | --- | --- | --- |
| ⃞ | $40 | Steel strip – blue, 8-½” x ¾” | $20 | $5 |  |
| ⃞ | $40 | Steel strip – yellow, 5-½” x ¾” | $15 | $5 |  |
| ⃞ | $40 | Steel strip – red, 5-½” x ¾” | $35 | $5 |  |
| ⃞ | $40 | Steel strip – green, 5-½” x ¾” | $35 | $5 |  |

**⃞** Max Welker Welding Order ($100 processing fee)

| **Order** | **Setup Fee** | **Product** | **Unit Price** | **Shipping** | **Quantity** |
| --- | --- | --- | --- | --- | --- |
| ⃞ | - | Basic welding wire – 50 count | $75 | $15 |  |
| ⃞ | - | Red welding wire – 100 count | $200 | $30 |  |
| ⃞ | - | Green welding wire – 100 count | $200 | $30 |  |
|  | | Welder (one week rental) | $50 | - |  |

(Print 10 copies of this page)

Note: the order forms are in order when all five sheets are cut together on a paper cutter.
